# Supplementary material for: The protein kinase complex CBL10–CIPK8–SOS1 functions in Arabidopsis to regulate salt tolerance
Source: PubMed Central journal article supplement (PMC7242078; doi:10.1093/jxb/erz549), 2019-12-10
Supplement: erz549_suppl_supplementary_material.pdf [file erz549_suppl_supplementary_material.pdf]

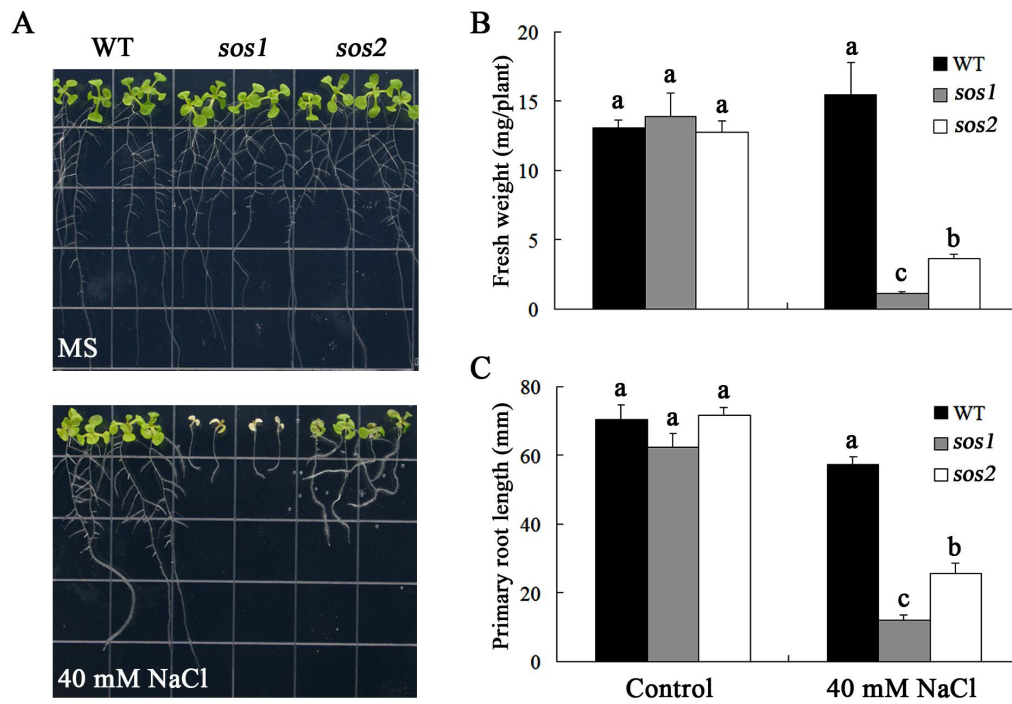

**Fig. S1.** The effect of NaCl treatment on the growth of *Arabidopsis sos1* and *sos2* seedlings. (A) Five-day-old wild-type, *sos1* and *sos2* seedlings were transferred onto MS plates containing 0 and 40 mM NaCl, respectively. The pictures were taken after 7 d treatment. Fresh weight (B) and primary root length (C) were measured at day 7 after NaCl treatment. Values are mean  $\pm$  SE (n=12) and different letters above the columns indicate significant differences at  $p < 0.05$  level among the different data.

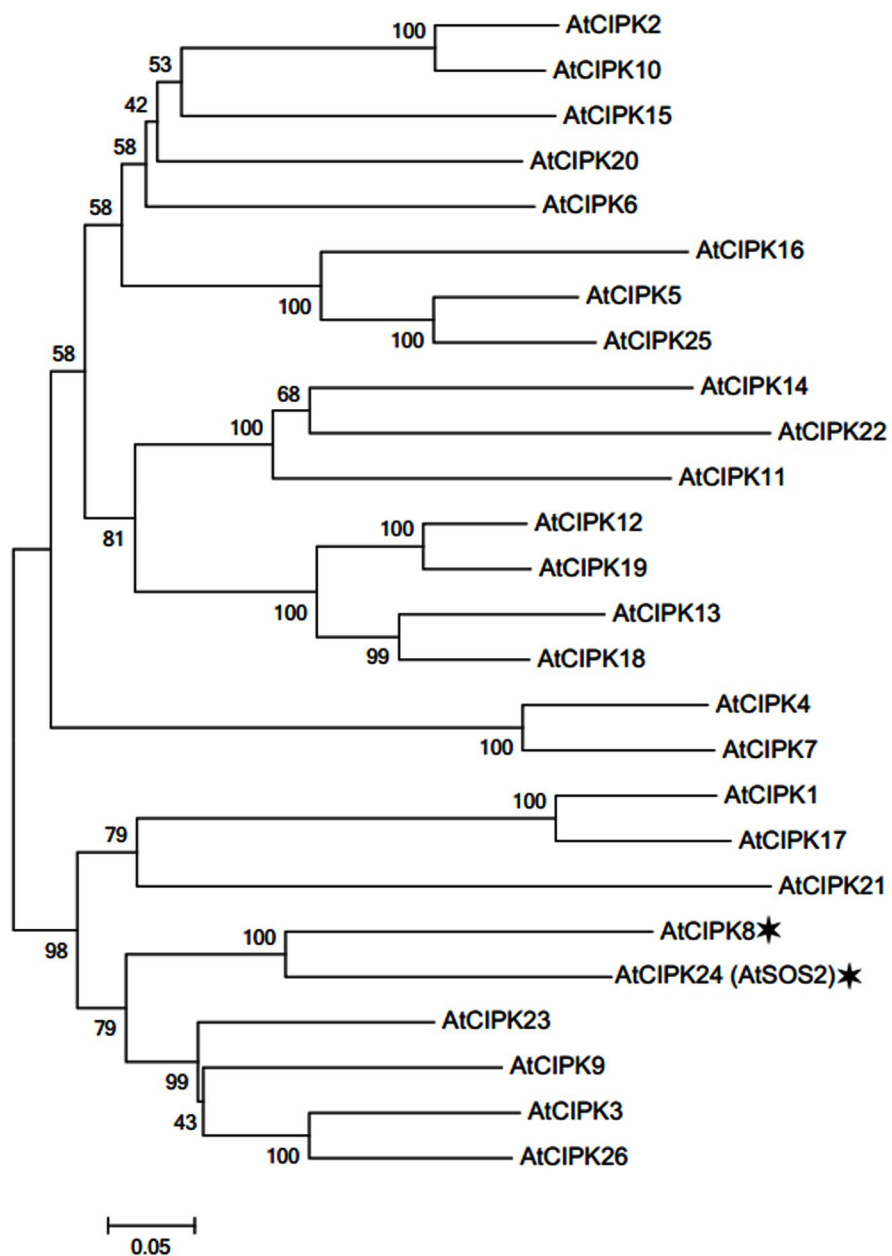

**Fig. S2.** Phylogenetic tree analysis of *Arabidopsis thaliana* CIPK proteins.

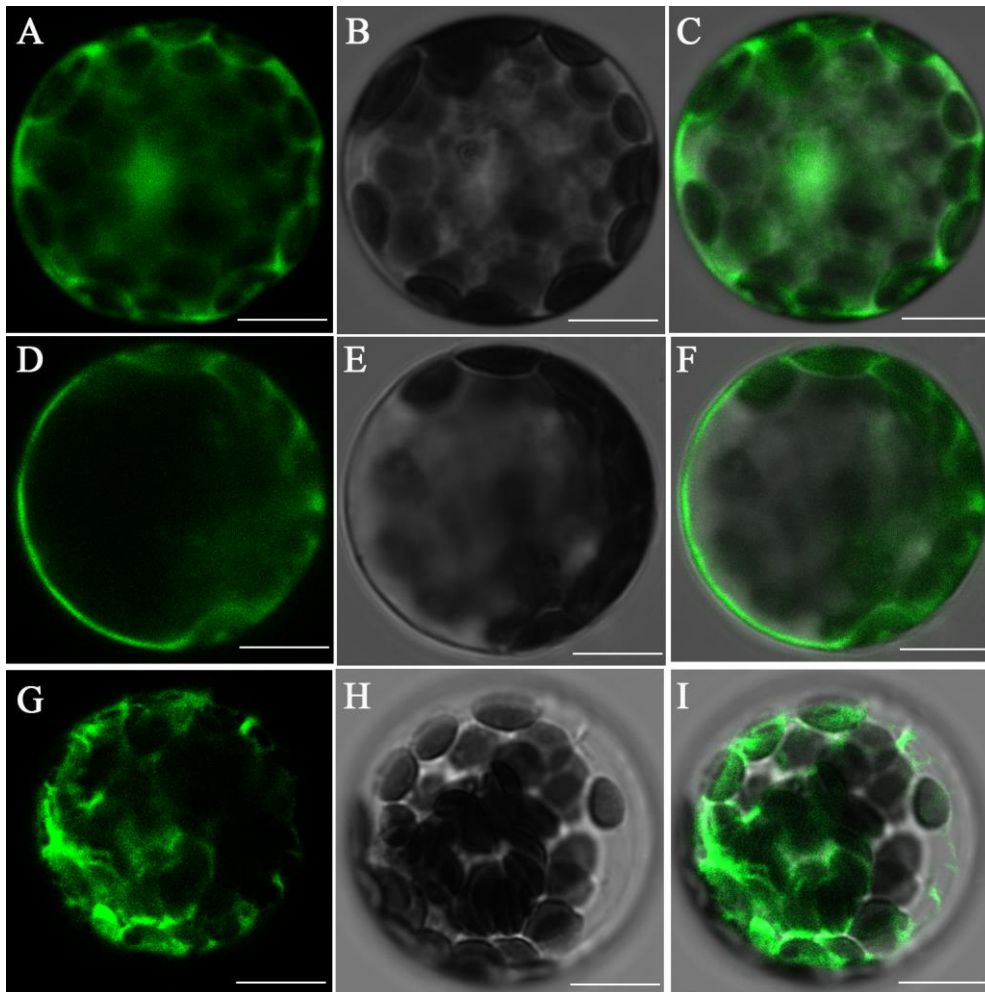

**Fig. S3.** CIPK8 and SOS2 localize to the cytoplasm. (A) to (C) Fluorescent signal of *Arabidopsis* mesophyll protoplast transformed with pCAMBIA1300-*GFP*. (D) to (F) Fluorescent signal of *Arabidopsis* mesophyll protoplast transformed with pCAMBIA1300-*CIPK8-GFP*. (G) to (I) Fluorescent signal of *Arabidopsis* mesophyll protoplast transformed with pCAMBIA1300-*SOS2-GFP*. Bars = 10  $\mu$ m.

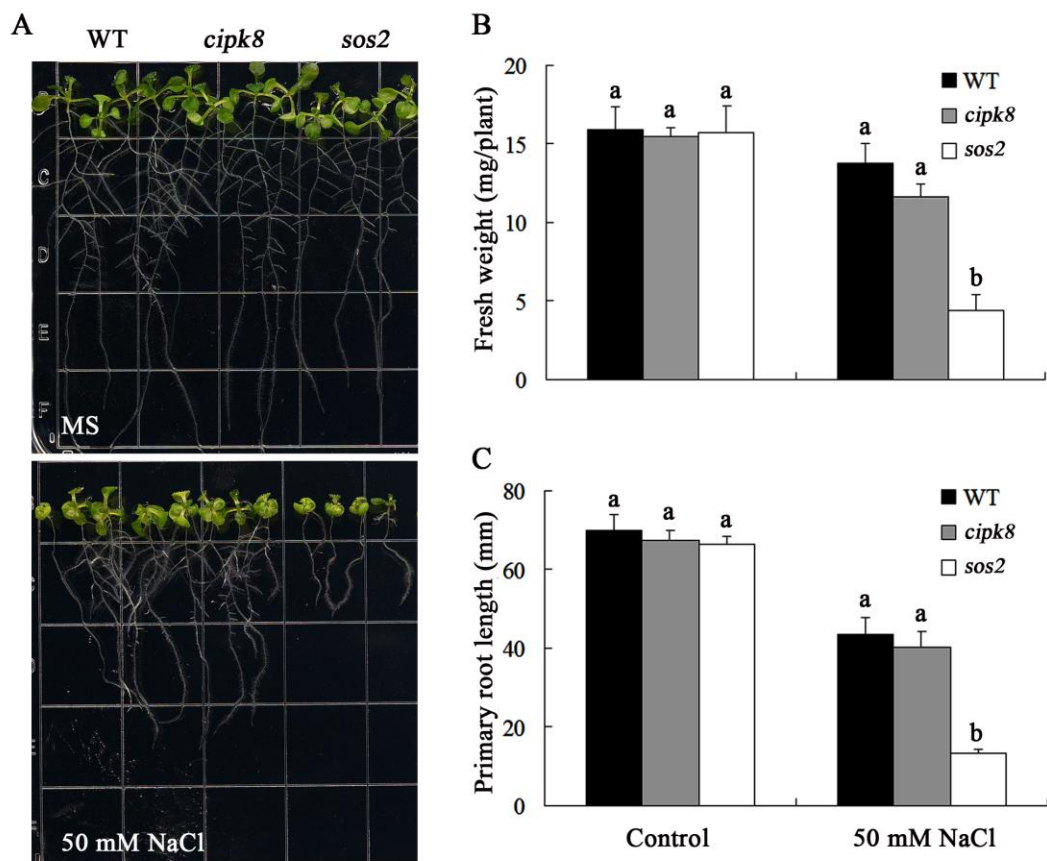

**Fig. S4.** The responses of *cipk8* and *sos2* to NaCl treatment. (A) WT, *cipk8* and *sos2* seedlings were photographed after 7 days of NaCl treatment. Fresh weights (B) and primary root lengths (C) of WT, *cipk8* and *sos2* were measured at day 7 after NaCl treatment. Values are mean  $\pm$  SE (n=12) and different letters above the columns indicate significant differences at  $p < 0.05$  level among the different data.

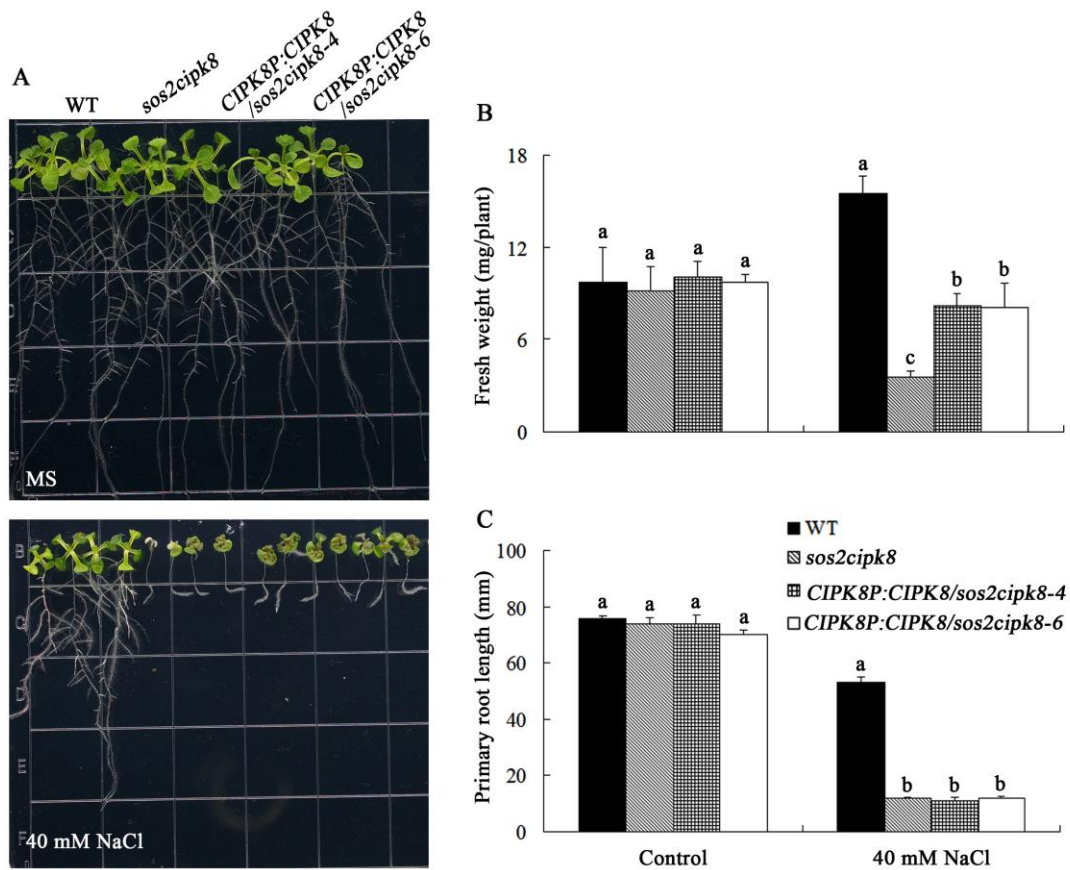

**Fig. S5.** *CIPK8* expression partly rescues the salt sensitivity phenotype of *sos2cipk8*. A 5502 bp of DNA fragment containing *CIPK8* promoter and *CIPK8* gene (*CIPK8P:CIPK8*) was introduced into *sos2cipk8* double mutant plants through mediation of vector pCAMBIA1300. Eight of *CIPK8*-transgenic homozygote lines (*CIPK8P:CIPK8/sos2cipk8*) were screened from T3 generations. Two transgenic lines, *CIPK8P:CIPK8/sos2cipk8-4* and *CIPK8P:CIPK8/sos2cipk8-6*, were used for the followed experiments. The pictures were taken after seedlings of WT, *sos2cipk8* and *CIPK8P:CIPK8/sos2cipk8* plants grew under salt stress for 7 days (A), and then the fresh weights (B) and primary root lengths (C) were determined. Data represent the mean  $\pm$  SE of twelve replicates and different letters above the columns indicate significant differences at  $p < 0.05$  level among the different data.

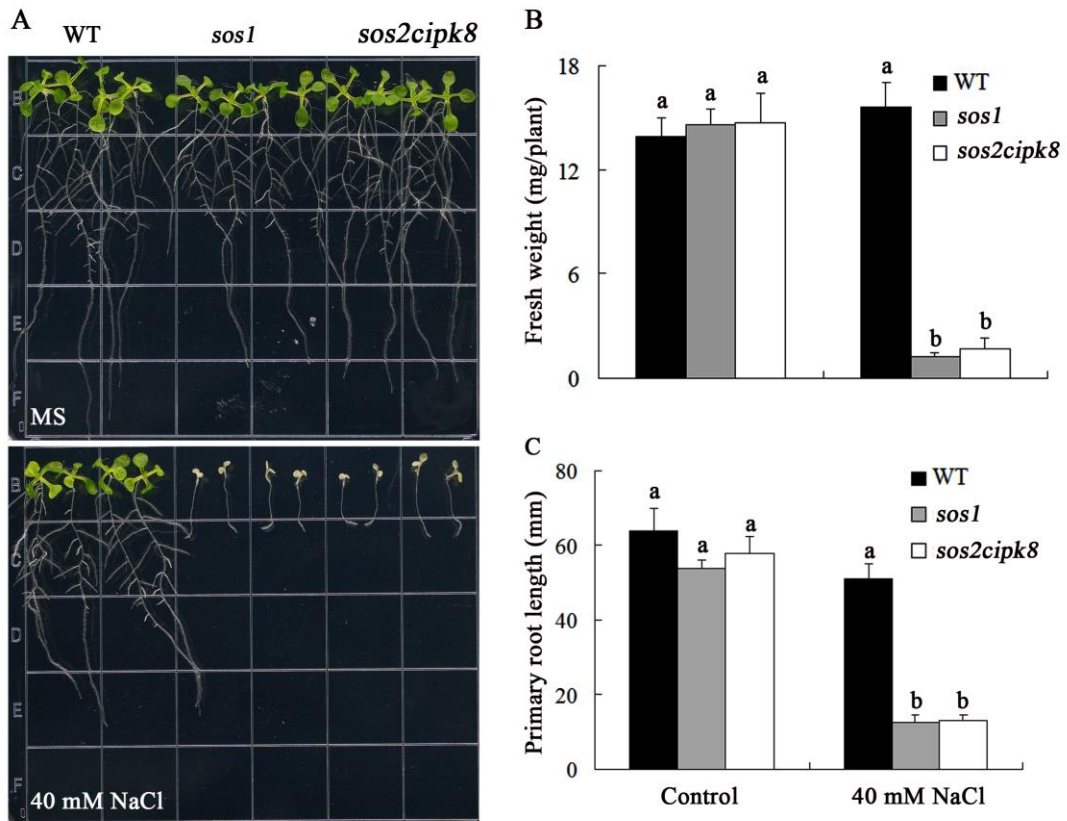

**Fig. S6.** The response of *sos2cipk8* and *sos1* to salt stress. (A) WT, *sos1* and *sos2cipk8* seedlings were photographed after 7 days of NaCl treatment. Fresh weights (B) and primary root lengths (C) of WT, *sos1* and *sos2cipk8* after 7 days of NaCl treatment. Values are mean  $\pm$  SE (n=12) and different letters above the columns indicate significant differences at  $p < 0.05$  level among the different data.

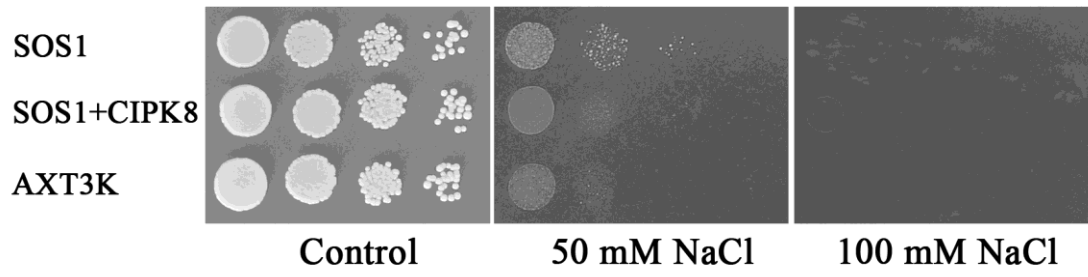

**Fig. S7.** The effect of NaCl treatment on the growth of *SOS1*- and *SOS1+CIPK8*-transgenic yeast cells.



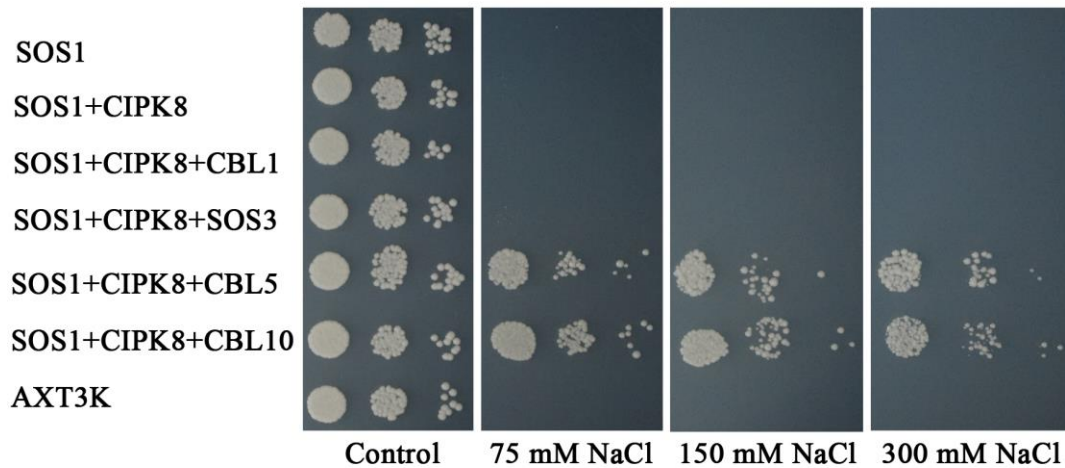

**Fig. S8.** Salt tolerance tests of the yeast mutant strain AXT3K expressing *SOS1* with or without *CIPK8* and combinations of *CBLs*. *SOS1* was cloned into the plasmid p416 (p416-*SOS1*); *CIPK8* and related *CBLs* were cloned into p414 (p414-*CIPK8-CBLs*) as described in the section “Materials and methods”. p416-*SOS1* alone or p416-*SOS1* and p414-*CIPK8-CBLs* together were transformed into AXT3K, respectively. Transgenic and untransformed yeast cells were spotted on AP plates with or without NaCl as described in the section “Materials and methods”, and cultured at 28°C for 3-5 days.



**Supplemental Table S1. Primers used in this study.**

| <b>Purpose</b>                        | <b>Primer</b> | <b>Primer sequence</b>                               |
|---------------------------------------|---------------|------------------------------------------------------|
| Identification of cipk8 mutant plants | LP            | GAATCAAGAGGCAACAACAGC                                |
|                                       | RP            | ATCGTGGATCGTAGCACAATC                                |
|                                       | LBb1.3        | ATTTTGCCGATTCGGAAC                                   |
| RT-PCR primers of SOS2                | SOS2-RT-F     | CGGGATCCATGACAAAGAAAATGAGAAG                         |
|                                       | SOS2-RT-R     | GTTCCACATGTGGTACGCAGAAGTTC                           |
| RT-PCR primers of CIPK8               | CIPK8-RT-F    | TTGGCCTCAGTGCATTACCT                                 |
|                                       | CIPK8-RT-R    | TAGTGGACCTGTGTCTCTTG                                 |
| RT-PCR primers of $\beta$ -Actin      | Actin-RT-F    | GAGGTTACATGTTCCACCACAACA                             |
|                                       | Actin-RT-R    | CCTGATATCCACATCACACTTCA                              |
| qRT-PCR primers of CIPK8              | CIPK8-qRT-F   | TTGGCCTCAGTGCATTACCT                                 |
|                                       | CIPK8-qRT-R   | CGGCACCATTGTAACCCTTG                                 |
| qRT-PCR primers of $\beta$ -Actin     | Actin-qRT-F   | TATGAATTACCCGATGGGCAAG                               |
|                                       | Actin-qRT-R   | TGGAACAAGACTTCTGGGCAT                                |
| CIPK8-GFP fusion                      | CIPK8-GFP-F   | ACGCGTCGACATGGTGGTAAGGAAGGTG                         |
|                                       | CIPK8-GFP-R   | GGACTAGTACGTCTTTTACTC                                |
| SOS2-GFP fusion                       | SOS2-GFP-F    | ACGCGTCGACATGACAAAGAAAATGAGAAGAGTG                   |
|                                       | SOS2-GFP-R    | GGACTAGTAAACGTGATTGTTCTGAGAATCTC                     |
| CIPK8 localization                    | CIPK8-221-F   | GGGGACAAGTTTGTACAAAAAAGCAGGCTTAATGGTGGTAAGGAAGGTGGGC |
|                                       | CIPK8-221-R   | GGGGACCACTTTGTACAAGAAAGCTGGGTCTCAACGTCTTTTACTCTTGG   |
| SOS2 localization                     | SOS2-221-F    | GGGGACAAGTTTGTACAAAAAAGCAGGCTTAATGACAAAGAAAATGAGAAG  |
|                                       | SOS2-221-R    | GGGGACCACTTTGTACAAGAAAGCTGGGTCTCAAACGTGATTGTTCTGAG   |

|                                  |                               |                                   |
|----------------------------------|-------------------------------|-----------------------------------|
| CIPK8 promoter                   | CIPK8P-F                      | GGGGTACCAAGAGGAGGAGGAGGAG         |
|                                  | CIPK8P-R                      | CATGCCATGGATTCTTCTGCTTCTAC        |
| CIPK8P:CIPK8 for complementation | CIPK8P-CIPK8-F                | GGGGTACCGTTCTCCCTGAGGCACATT       |
|                                  | CIPK8P-CIPK8-R                | ACGCGTCGACTCAACGTCTTTACTCTTGG     |
| For yeast two-hybrid system      | CIPK8-BD-F                    | CGGAATTCATGGTGGTAAGGAAGGTG        |
|                                  | CIPK8-BD-R                    | ACGCGTCGACGTTCAACGTCTTTACTC       |
|                                  | CBL1-AD-F                     | CGGAATTCATGGGCTGCTTCCACTCAAAG     |
|                                  | CBL1-AD-R                     | CGCGGATCCTCATGTGGCAATCTCATCG      |
|                                  | CBL2-AD-F                     | CGGAATTCATGTCGCAGTGC GTTGAC       |
|                                  | CBL2-AD-R                     | CGCGGATCCTCAGGTATCTTCAACCTGAG     |
|                                  | CBL3-AD-F                     | CGGAATTCATGTCGCAGTGCATAGACG       |
|                                  | CBL3-AD-R                     | CGCGGATCCTCAGGTATCTTCCACCTGC      |
|                                  | CBL4-AD-F                     | CGGAATTCATGGGCTGCTCTGTATCGAAG     |
|                                  | CBL4-AD-R                     | CCGCTCGAGTTAGGAAGATACGTTTTGC      |
|                                  | CBL5-AD-F                     | CGGAATTCATGGGATGTGTTTGACGA        |
|                                  | CBL5-AD-R                     | CGCGGATCCTTACCGGAGAAAGGTTGGG      |
|                                  | CBL6-AD-F                     | CGGAATTCATGATGATGCAATGTTTAGATGG   |
|                                  | CBL6-AD-R                     | CGCGGATCCTCATCCATCCAGCTCACTAGGAGT |
|                                  | CBL7-AD-F                     | CGGAATTCATGGATTCAACAAGAAATTC      |
|                                  | CBL7-AD-R                     | CGCGGATCCTCAGGTATCTTCCACTTGC      |
|                                  | CBL8-AD-F                     | CGGAATTCATGTTGGCATTCGTGAAATG      |
|                                  | CBL8-AD-R                     | TCCCCGGGCTAGTCTTCAACTTCAGAGTCGAGT |
|                                  | CBL9-AD-F                     | CGGAATTCATGGGTTGTTTCCATTCCACGG    |
|                                  | CBL9-AD-R                     | CGCGGATCCTCACGTCGCAATCTCGTCC      |
| CBL10-AD-F                       | CGGGATCCGTATGGAACAAGTTTCTCTAG |                                   |

|                 |                            |                                        |
|-----------------|----------------------------|----------------------------------------|
|                 | CBL10-AD-R                 | CCGCTCGAGCGTCAGTCTTCAACCTCAGTGT        |
| Split-LUC assay | CIPK8-cLUC-F               | GGGGTACCATGGTGGTAAGGAAGGTG             |
|                 | CIPK8-cLUC-R               | ACGCGTCGACTCAACGTCTTTACTCT             |
|                 | SOS2-cLUC-F                | GGGGTACCATGACAAAGAAAATGAGAAGAGT        |
|                 | SOS2-cLUC-R                | ACGCGTCGACTCAAACGTGATTGTTC             |
|                 | SOS3-nLUC-F                | TCGGTACCCGGGATCCaATGGGCTGCTCTGTATCGAAG |
|                 | SOS3-nLUC-R                | ACGAGATCTGGTTCGACGGAAGATACGTTTTGC      |
|                 | CBL10-nLUC-F               | TCGGTACCCGGGATCCaATGACAACCTGGCCGA      |
|                 | CBL10-nLUC-R               | ACGAGATCTGGTTCGACGTCTTCAACCTCAGTG      |
|                 | Yeast complementation test | SOS1-p416-F                            |
| SOS1-p416-R     |                            | TCCCCGGGTCACTGATCAGAGCTTGAGCTAC        |
| CIPK8-p414-F    |                            | CGGGATCCATGGTGGTAAGGAAGGTG             |
| CIPK8-p414-R    |                            | ACGCGTCGACGTTCAACGTCTTTACTC            |
| SOS2-p414-F     |                            | CGGGATCCATGACAAAGAAAATGAGAAGAGT        |
| SOS2-p414-R     |                            | CGGAATTCTCAAACGTGATTGTTC               |
| CIPK8-F         |                            | ACTAGTATGGTGGTAAGGAAGGTGGGC            |
| CIPK8-CYC1-R    |                            | ATAACTAATTACATGATCAACGTCTTTACTCTTG     |
| CYC1-CIPK8-F    |                            | CAAGAGTAAAAGACGTTGATCATGTAATTAGTTAT    |
| CYC1-R          |                            | GCGGATCCGGCCGCAAATTAAGCCTTC            |
| SOS2-F          |                            | GACTAGTATGACAAAGAAAATGAGAAG            |
| SOS2-CYC1-R     |                            | ATAACTAATTACATGATCAAACGTGATTGTTC       |
| CYC1-SOS2-F     |                            | GAACAATCACGTTTTGATCATGTAATTAGTTAT      |
| GPD-F           |                            | GCGGATCCAGTTTATCATTATCAATAC            |
| GPD-CBL1-F      |                            | CTTTGAGTGGAAGCAGCCCATATCCGTCGAAACTAAG  |
| CBL1-GPD-R      |                            | CTTAGTTTCGACGGATATGGGCTGCTTCCACTCAAAG  |

|                        |                   |                                                                  |
|------------------------|-------------------|------------------------------------------------------------------|
|                        | CBL1-R            | ATAGTCGACTCATGTGGCAATCTCATCG                                     |
|                        | GPD-CBL4-F        | CTTCGATACAGAGCAGCCCATATCCGTCGAAACTAAG                            |
|                        | CBL4-GPD-R        | CTTAGTTTCGACGGATATGGGCTGCTCTGTATCGAAG                            |
|                        | CBL4-R            | ATAGTCGACTTAGGAAGATACGTTTTGC                                     |
|                        | GPD-CBL5-F        | TGCTGCAAACACATCCCATATCCGTCGAAACTAAG                              |
|                        | CBL5-GPD-R        | CTTAGTTTCGACGGATATGGGATGTGTTTGCAGCA                              |
|                        | CBL5-R            | ATAGTCGACTTACCGGAGAAAGGTTGGG                                     |
|                        | GPD-CBL10-R       | GGTCGGCCAGTTGTCATATCCGTCGAAACTAAG                                |
|                        | CBL10-GPD-F       | CTTAGTTTCGACGGATATGACAACTGGCCGACC                                |
|                        | CBL10-R           | ATAGTCGACTCAGTCTTCAACCTCAGTG                                     |
| Site-mutations of SOS1 | SOS1-p416-F       | GCTCTAGAATGACGACTGTAATCGACGCG                                    |
|                        | 1136A-p416-R      | CGGGGTACCTCATAGATCGTTCCTGAAAACGATTTTACTCGGagcgTCGATTCTCACAACGATT |
|                        | 1138A-p416-R      | CGGGGTACCTCATAGATCGTTCCTGAAAACGATTTTcgCGGcGAATCGATTCTCACAACGATT  |
|                        | 1136A1138A-p416-R | CGGGGTACCTCATAGATCGTTCCTGAAAACGATTTTcgCGGcgcgTCGATTCTCACAACGATT  |
